# Supplementary material for: Promoted CO2 photoreduction toward HCOOH generation through a nucleophilic effect in Co/Mg synergistic catalysis
Source: Royal Society of Chemistry journal article supplement (doi:10.1039/d4gc03381g), 2024-01-01
Supplement: d4gc03381g1.pdf [file d4gc03381g1.pdf]

# Promoted CO<sub>2</sub> photoreduction toward HCOOH generation by nucleophilic effect in Co/Mg synergistic catalysis

Luyao Wang,<sup>a,b</sup> Siqu You,<sup>a</sup> Yaru Gong,<sup>b</sup> Jianxia Gu,<sup>c</sup> Jiangwei Zhang,<sup>d</sup> Guogang Shan,<sup>\*a</sup> Bo Zhu,<sup>\*a</sup> Weiting Yang,<sup>b</sup> Chunyi Sun,<sup>\*a</sup> Xinlong Wang<sup>a</sup> and Zhongmin Su<sup>a,b</sup>

<sup>a</sup> National & Local United Engineering Laboratory for Power Batteries, Department of Chemistry, Northeast Normal University, Changchun 130024, China

<sup>b</sup> School of Chemistry and Chemical Engineering Hainan University, No. 58 Renmin Road, Haikou 570228, P. R. China

<sup>c</sup> Department of Chemistry, Xinzhou Normal University, Xinzhou, China

<sup>d</sup> Science Center of Energy Material and Chemistry, College of Chemistry and Chemical Engineering, Inner Mongolia University, Hohhot, China

## 1. Materials and Characterizations

The ligand H<sub>4</sub>TCPP was synthesized by a documented method. All the chemicals were of analytical grade and purchased from commercial sources without any further purification. ICP spectroscopy was conducted on Agilent 7500a Inductively Coupled Plasma Mass Spectrometry (ICP-MS 7500). TEM images were recorded on a JEM-2010 transmission electron microscope at an accelerating voltage of 200 kV. XPS was performed using an Escalab 250 instrument. Powder X-ray diffraction (PXRD) patterns were collected on a Siemens D5005 diffractometer with Cu-K $\alpha$  radiation ( $\lambda=1.5418$  Å) in the range of 5-40° at room temperature. Thermogravimetric analysis (TGA) was performed on a PerkinElmer TG-7 analyzer heated from 30-800 °C at the heating rate of 10 °C·min<sup>-1</sup> under a dry nitrogen gas atmosphere.

## 2. Computational calculation method

The ground-state geometry optimizations, vibrational frequency calculations were performed on the CoMg-TCPP and Co-TCPP catalyzed HCOOH formation at the B3LYP/[6-31G(d,p)/LanL2DZ(Co,Mg)] level. All calculations were carried out with the Gaussian 16 program [1].

## 3. Synthesis

### Synthesis of Mg-TCPP

Mg(NO<sub>3</sub>)<sub>2</sub>·6H<sub>2</sub>O (60mg, 0.23 mmol) and H<sub>4</sub>TCPP (10.0 mg, 0.017 mmol) were dissolved in the mixture of N, N'-dimethylacetamide (DMF 3 mL) and acetonitrile (1 mL) and nitric acid (60 $\mu$ L). The as-obtained mixture was transferred to a stainless steel Teflon-lined autoclave of 20 mL capacity. Stir at room temperature for 1 hour and place in a pre-heated oven at 130°C for 30h. Cool naturally to room temperature. The resulting colorless product was washed 3 times in DMF to remove other magazine ions from the solution [2].

### Synthesis of Co-TCPP

Co (NO<sub>3</sub>)<sub>2</sub>·6H<sub>2</sub>O (35 mg, 0.12 mmol) and H<sub>4</sub>TCPP (10.0 mg, 0.017 mmol) were dissolved in the

mixture of N, N'-dimethylacetamide (DMF 3 mL) and acetonitrile (1 mL) and nitric acid (50 $\mu$ L). The as-obtained mixture was transferred to a stainless steel Teflon-lined autoclave of 20 mL capacity. Stir at room temperature for 1 hour and place in a pre-heated oven at 130°C for 30h. Cool naturally to room temperature. The resulting mauve product was washed 3 times in DMF to remove other magazine ions from the solution [3].

#### 4. Figures and Tables

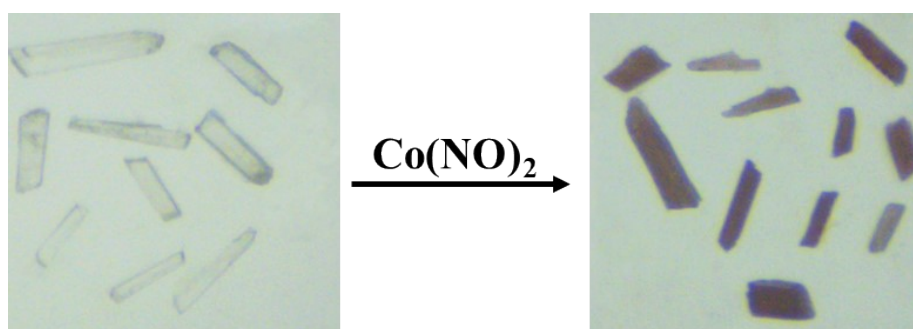

**Fig. S1.** Crystal before and after ion exchange.

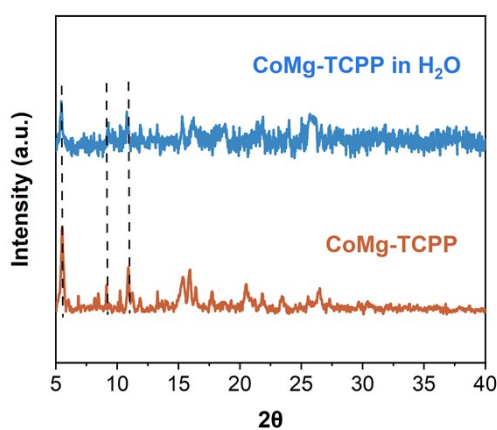

**Fig. S2.** PXRD of CoMg-TCPP after 48 h immersion in H<sub>2</sub>O.

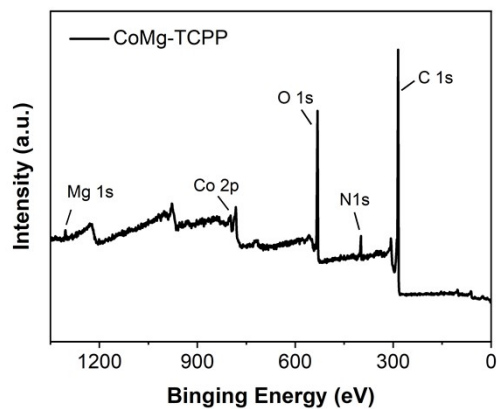

**Fig. S3.** The fully scanned spectrum of CoMg-TCPP.

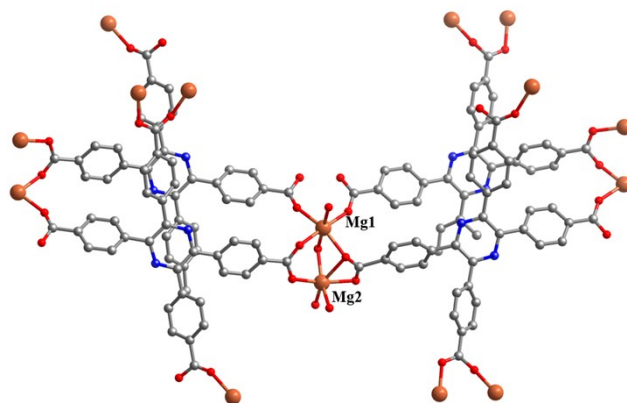

**Fig. S4.** The coordination-environment of Mg-TCPP.

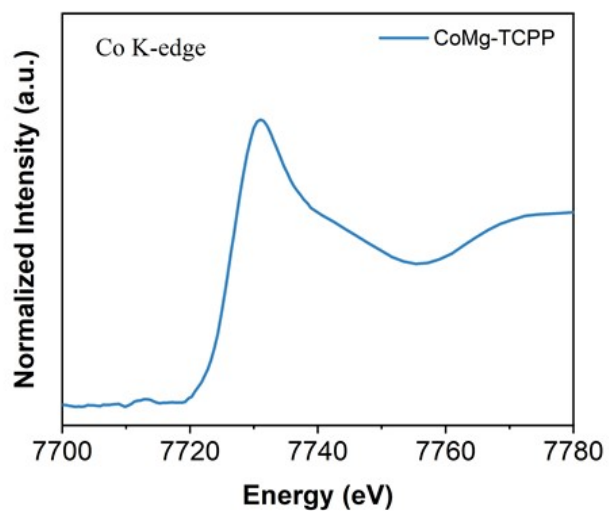

**Fig. S5.** Co K-edge XANES spectra of CoMg-TCPP.

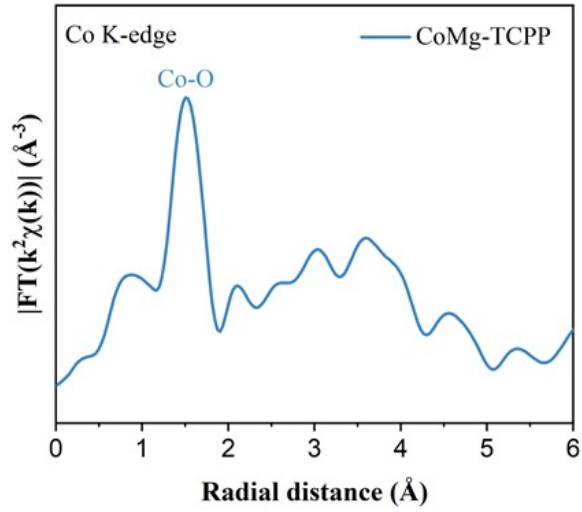

**Fig. S6.** Magnitude of  $k^2$ -weighted Fourier transforms of the Co K-edge EXAFS spectra of CoMg-TCPP.

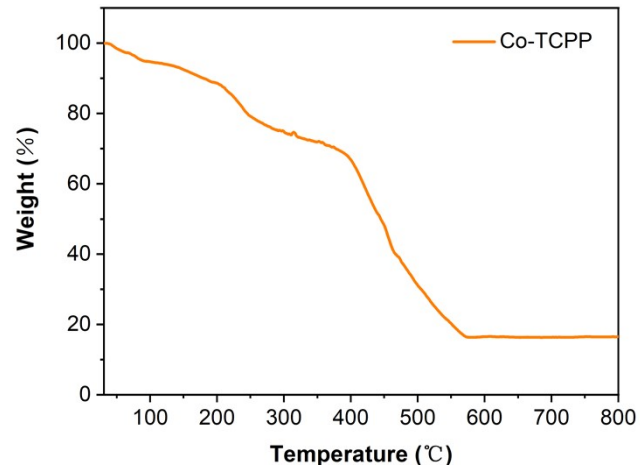

**Fig. S7.** TGA curves of Co-TCPP.

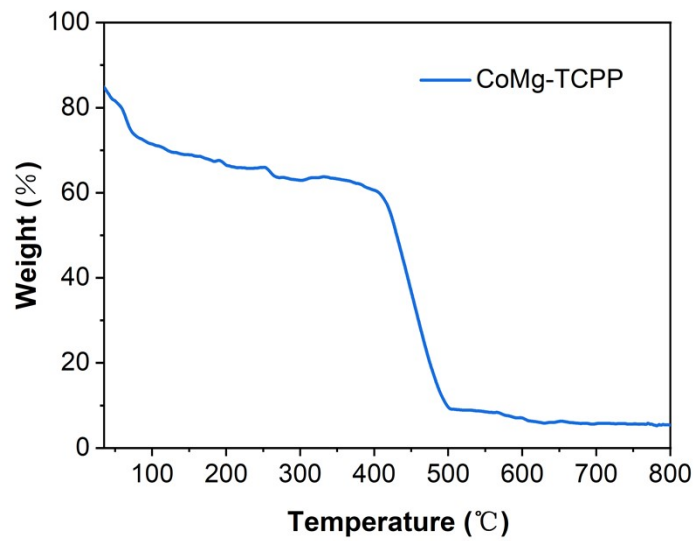

**Fig. S8.** TGA curves of CoMg-TCPP.

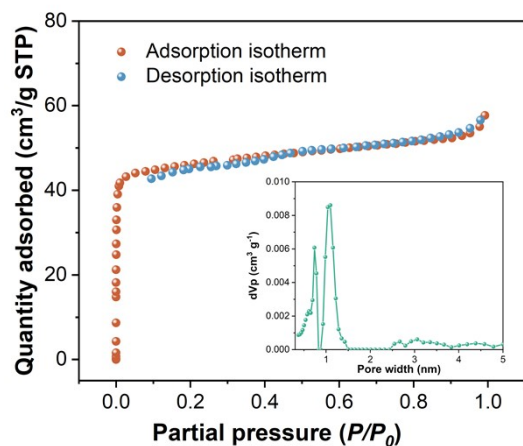

**Fig. S9.** N<sub>2</sub> adsorption and desorption isotherms of CoMg-TCPP at 77 K (inset: pore size distribution).

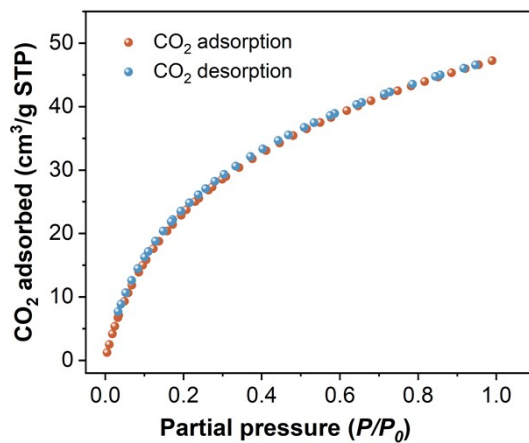

**Fig. S10.** CO<sub>2</sub> adsorption and desorption isotherms of CoMg-TCPP at 298 K.

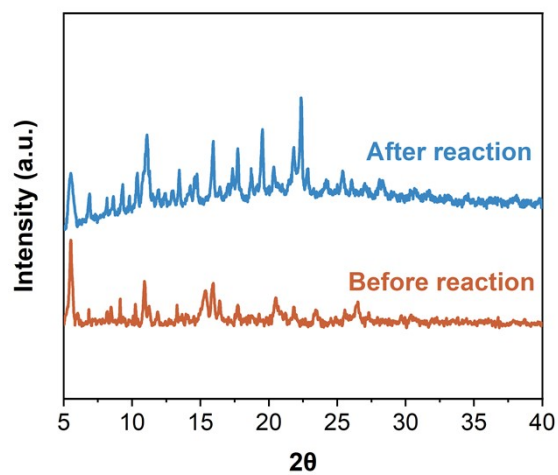

**Fig. S11.** PXRD of CoMg-TCPP before and after 2 h photocatalytic reaction.

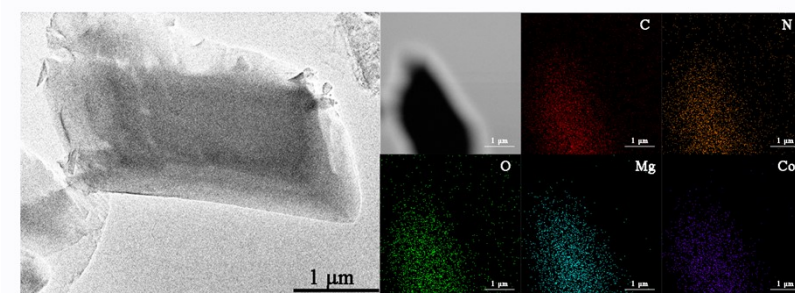

**Fig. S12.** HRTEM and EDS mapping images of CoMg-TCPP after photocatalytic reaction.

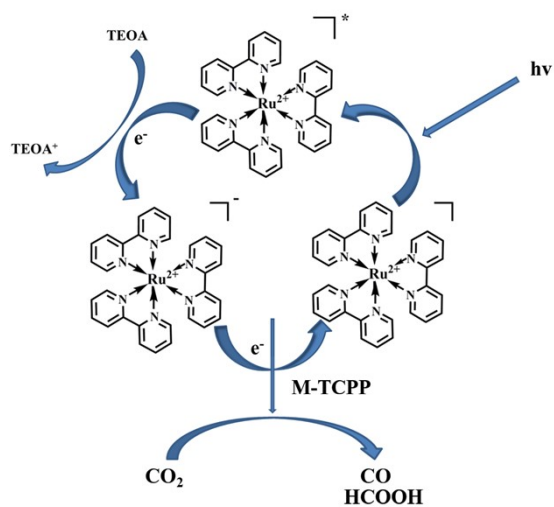

**Fig. S13.** Schematic of the CO<sub>2</sub> photocatalytic system

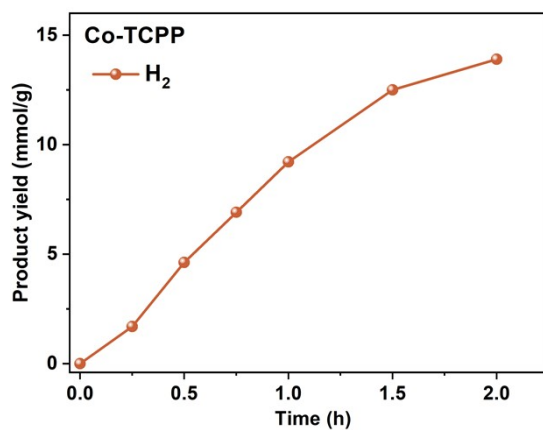

**Fig. S14.** Time-course profiles of H<sub>2</sub> catalyzed by Co-TCPP.

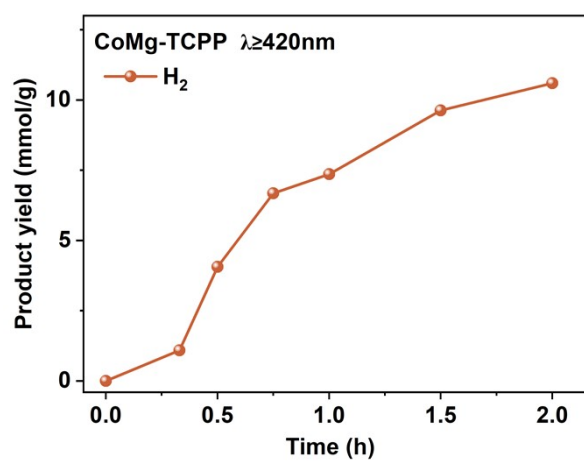

Fig. S15. Time-course profiles of H<sub>2</sub> catalyzed by CoMg-TCPP.

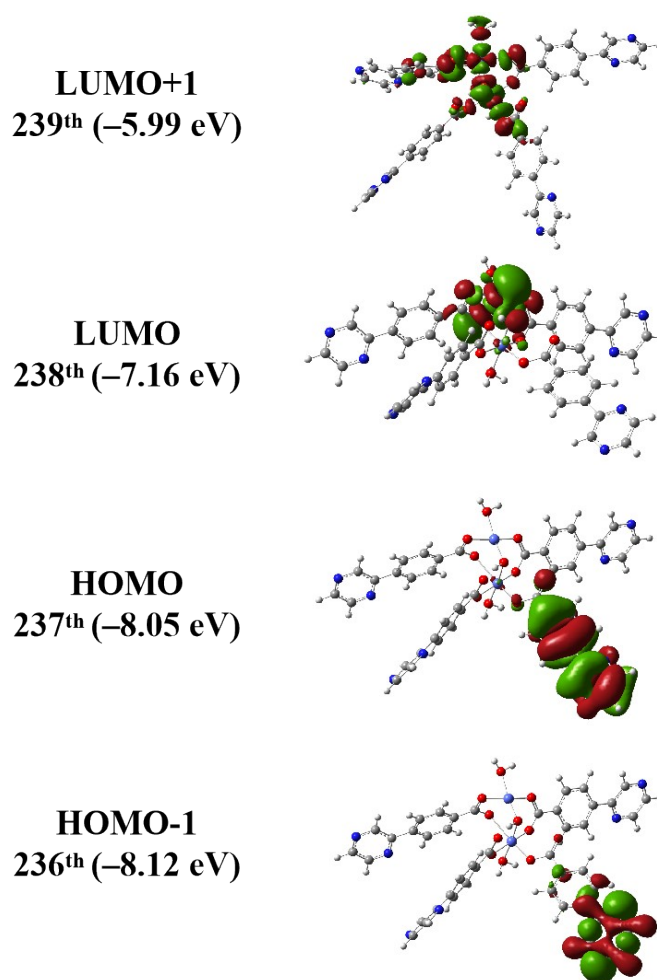

Fig. S16. The Kohn-Sham orbitals of Co-TPPP.

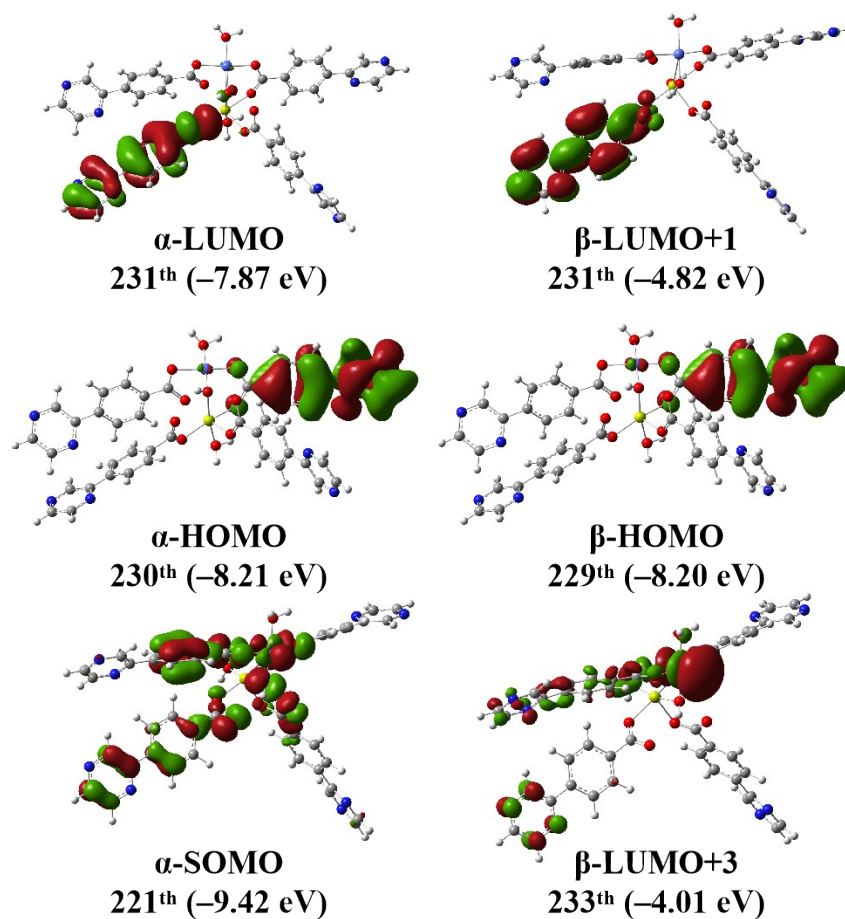

**Fig. S17.** The Kohn-Sham orbitals of CoMg-TPPP.

**Table S1** Compared to other MOF-based photocatalytic CO<sub>2</sub> reduction of CO.

| MOFs                 | Quantity      | Light<br>[nm]      | Time<br>[h] | CO<br>[ $\mu$ mol] | H <sub>2</sub><br>[ $\mu$ mol] | Ref       |
|----------------------|---------------|--------------------|-------------|--------------------|--------------------------------|-----------|
| <b>Co-TCPP</b>       | 1 mg          | $\lambda \geq 420$ | 1           | 12.71              | 9.21                           | This work |
| <b>CoMg-TCPP</b>     | 1 mg          | $\lambda \geq 420$ | 1           | 14.34              | 7.36                           | This work |
| MOF-Co               | 0.5 mg        | $\lambda \geq 420$ | 5           | 22.8               | 25.3                           |           |
| MOF-Ni               | 0.5 mg        | $\lambda \geq 420$ | 12          | 22.3               | 0.52                           | [4]       |
| MOF-Cu               | 0.5 mg        | $\lambda \geq 420$ | 5           | 1.7                | 5.8                            |           |
| Co-ZIF-9             | 0.8 $\mu$ mol | $\lambda \geq 420$ | 0.5         | 41.8               | 29.9                           |           |
| Co-MOF-74            | 0.8 $\mu$ mol | $\lambda \geq 420$ | 0.5         | 11.7               | 14.6                           | [5]       |
| Mn-MOF-74            | 0.8 $\mu$ mol | $\lambda \geq 420$ | 0.5         | 1.5                | 1.8                            |           |
| Co <sub>6</sub> -MOF | 0.005 mmol    | $\lambda \geq 420$ | 0.5         | 3.73               | 2.81                           | [6]       |
| Co-UiO-67            | 1 mg          | 400-800            | 4           | 13.2               | 49                             | [7]       |
| Zr-DMBD              | 0.1 mg        | $\lambda = 450$    | 10          | 3.33               | 0.041                          | [8]       |



**Table S2** Compared to other MOF-based photocatalytic CO<sub>2</sub> reduction of HCOOH.

| MOFs                                          | Time<br>[h] | HCOOH<br>[μmol] | Ref       |
|-----------------------------------------------|-------------|-----------------|-----------|
| <b>CoMg-TCPP</b>                              | 1           | 940             | This work |
| NH <sub>2</sub> -UiO-66(Zr)                   | 1           | 13.2            | [9]       |
| TFZS                                          | 3           | 1693            | [10]      |
| Ni <sub>0.75</sub> Mg <sub>0.25</sub> -MOF-74 | 1           | 638             | [11]      |
| Cu <sub>2</sub> O-Pt/SiC/IrOx                 | 1           | 896.7           | [12]      |
| UiO67-Ir-Cou 6/Cu                             | 1           | 480.7           | [13]      |
| P@U                                           | 1           | 146             | [14]      |
| NH <sub>2</sub> -C@Cu <sub>2</sub> O          | 1           | 22.5            | [15]      |
| PCN-222                                       | 1           | 30              | [16]      |
| Co/NH <sub>2</sub> -MIL-125(Ti)               | 1           | 38.4            | [17]      |

**Table S3** The research of reaction conditions of Co-TCPP.

| Co-TCPP              |                   |                       |
|----------------------|-------------------|-----------------------|
| Entry                | CO [μmol]         | H <sub>2</sub> [μmol] |
| <b>1<sup>a</sup></b> | 12.71             | 9.21                  |
| <b>2<sup>b</sup></b> | n.d. <sup>c</sup> | n.d.                  |
| <b>3<sup>d</sup></b> | n.d.              | n.d.                  |
| <b>4<sup>e</sup></b> | 0.25              | 0.51                  |
| <b>5<sup>f</sup></b> | n.d.              | 0.77                  |
| <b>6<sup>g</sup></b> | n.d.              | n.d.                  |

<sup>a</sup> Reaction conditions: [Ru(bpy)<sub>3</sub>]Cl<sub>2</sub>·6H<sub>2</sub>O (6 mg), Co-TCPP (1 mg) acetonitrile (MeCN, 4 mL), H<sub>2</sub>O (1 mL), TEOA (1 mL), 30 °C, 1 h. <sup>b</sup> In the dark. <sup>c</sup> Not detectable. <sup>d</sup> Without [Ru(bpy)<sub>3</sub>]Cl<sub>2</sub>·6H<sub>2</sub>O. <sup>e</sup> Without the Co-TCPP. <sup>f</sup> Using Ar to replace CO<sub>2</sub>. <sup>g</sup> Without TEOA.

**Table S4** The research of reaction conditions of CoMg-TCPP.

| CoMg-TCPP            |                   |                       |
|----------------------|-------------------|-----------------------|
| Entry                | CO [μmol]         | H <sub>2</sub> [μmol] |
| <b>1<sup>a</sup></b> | 14.34             | 7.36                  |
| <b>2<sup>b</sup></b> | n.d. <sup>c</sup> | n.d.                  |
| <b>3<sup>d</sup></b> | n.d.              | n.d.                  |
| <b>4<sup>e</sup></b> | 0.25              | 0.51                  |
| <b>5<sup>f</sup></b> | n.d.              | 0.63                  |
| <b>6<sup>g</sup></b> | n.d.              | n.d.                  |
| <b>7<sup>h</sup></b> | 7.46              | 23.57                 |

<sup>a</sup> Reaction conditions: [Ru(bpy)<sub>3</sub>]Cl<sub>2</sub>·6H<sub>2</sub>O (6 mg), CoMg-TCPP (1 mg) acetonitrile (MeCN, 4 mL), H<sub>2</sub>O (1 mL), TEOA (1 mL), 30 °C, 1 h. <sup>b</sup> In the dark. <sup>c</sup> Not detectable. <sup>d</sup> Without [Ru(bpy)<sub>3</sub>]Cl<sub>2</sub>·6H<sub>2</sub>O. <sup>e</sup> Without the CoMg-TCPP. <sup>f</sup> Using Ar to replace CO<sub>2</sub>. <sup>g</sup> Without TEOA. <sup>h</sup>Using CH<sub>3</sub>OH to replace MeCN.

**Table S5** The research of reaction conditions of CoMg-TCPP.

| Entry                | HCOOH [ $\mu\text{mol/g}$ ] |
|----------------------|-----------------------------|
| <b>1</b>             | 940                         |
| <b>2<sup>b</sup></b> | n.d. <sup>c</sup>           |
| <b>3<sup>d</sup></b> | n.d.                        |
| <b>4<sup>e</sup></b> | n.d.                        |
| <b>6<sup>f</sup></b> | n.d.                        |
| <b>8<sup>g</sup></b> | n.d.                        |

<sup>a</sup> Reaction conditions: [Ru(bpy)<sub>3</sub>]Cl<sub>2</sub>·6H<sub>2</sub>O (6 mg), CoMg-TCPP (1 mg) acetonitrile (MeCN, 4 mL), H<sub>2</sub>O (1 mL), TEOA (1 mL), 30 °C, 1 h. <sup>b</sup> In the dark. <sup>c</sup> Not detectable. <sup>d</sup> Without [Ru(bpy)<sub>3</sub>]Cl<sub>2</sub>·6H<sub>2</sub>O. <sup>e</sup> Without the CoMg-TCPP. <sup>f</sup> Using Ar to replace CO<sub>2</sub>. <sup>g</sup> Without TEOA.

## References

1. Frisch, M. J.; Trucks, G. W.; Schlegel, H. B.; Scuseria, G. E.; Robb, M. A.; Cheeseman, J. R.; Scalmani, G.; Barone, V.; Petersson, G. A.; Nakatsuji, H.; Li, X.; Caricato, M.; Marenich, A. V.; Bloino, J.; Janesko, B. J.; Gomperts, R.; Mennucci, B.; Hratchian, H. P.; Ortiz, J. V.; Izmaylov, A. F.; Sonnenberg, J. L.; Williams-Young, D.; Ding, F.; Lipparini, F.; Egidi, F.; Goings, J.; Peng, B.; Petrone, A.; Henderson, T.; Ranasinghe, D.; Zakrzewski, V. G.; Gao, J.; Rega, N.; Zheng, G.; Liang, W.; Hada, M.; Ehara, M.; Toyota, K.; Fukuda, R.; Hasegawa, J.; Ishida, M.; Nakajima, T.; Honda, Y.; Kitao, O.; Nakai, H.; Vreven, T.; Throssell, K.; Montgomery, J. A.; Jr.; Peralta, J. E.; Ogliaro, F.; Bearpark, M. J.; Heyd, J. J.; Brothers, E. N.; Kudin, K. N.; Staroverov, V. N.; Keith, T. A.; Kobayashi, R.; Normand, J.; Raghavachari, K.; Rendell, A. P.; Burant, J. C.; Iyengar, S. S.; Tomasi, J.; Cossi, M.; Millam, J. M.; Klene, M.; Adamo, C.; Cammi, R.; Ochterski, J. W.; Martin, R. L.; Morokuma, K.; Farkas, O.; Foresman, J. B.; Fox, D. J. Gaussian 16, revision C. 01. Gaussian, Inc., Wallingford CT: 2019.
2. L. Wang, W. Chen, W. Song, J. Tian, J. Sun, L. Wen, C. Sun, X. Wang, Z. Su and G. G. Shan, *Chin. Chem. Lett.*, 2023, **34**, L. Wang, W. Chen, W. Song, J. Tian, J. Sun, L. Wen, C. Sun, X. Wang, Z. Su and G.-G. Shan, *Chin. Chem. Lett.*, 2023, **34**, 107291.
3. X. K. Wang, J. Liu, L. Zhang, L. Z. Dong, S. L. Li, Y. H. Kan, D. S. Li and Y. Q. Lan, *ACS Catal.*, 2019, **9**, 1726-1732.
4. S. Wang, W. Yao, J. Lin, Z. Ding and X. Wang, *Angew. Chem. Int. Ed.*, 2013, **53**, 1034-1038.
5. J. Zhao, Q. Wang, C. Sun, T. Zheng, L. Yan, M. Li, K. Shao, X. Wang and Z. Su, *J. Mater. Chem. A*, 2017, **5**, 12498-12505.
6. X. Gao, B. Guo, C. Guo, Q. Meng, J. Liang and J. Liu, *ACS Appl. Mater. Interfaces*, 2020, **12**, 24059-24065.
7. D. C. Liu, T. Ouyang, R. Xiao, W. J. Liu, D. C. Zhong, Z. Xu and T. B. Lu, *ChemSusChem*, 2019, **12**, 2166-2170.
8. D. Sun, Y. Fu, W. Liu, L. Ye, D. Wang, L. Yang, X. Fu and Z. Li, *Chem. Eur. J.*, 2013, **19**, 14279-14285.
9. E. Luévano-Hipólito and L. M. Torres-Martínez, *Mater Sci Semicond Process*, 2021, **134**, 106029.

10. S. H. Guo, X. J. Qi, H. M. Zhou, J. Zhou, X. H. Wang, M. Dong, X. Zhao, C. Y. Sun, X. L. Wang and Z.-M. Su, *J. Mater. Chem. A*, 2020, **8**, 11712-11718.
11. Y. Wang, X. Shang, J. Shen, Z. Zhang, D. Wang, J. Lin, J. C. S. Wu, X. Fu, X. Wang and C. Li, *Nat. Commun.*, 2020, **11**, 2041-1723.
12. S. Guo, L. H. Kong, P. Wang, S. Yao, T. B. Lu and Z. M. Zhang, *Angew. Chem. Int. Ed.*, 2022, **61**, e202206193.
13. H. B. Huang, Z. B. Fang, R. Wang, L. Li, M. Khanpour, T. F. Liu and R. Cao, *Small*, 2022, **18**, 2200407 .
14. Q. Zhu, Y. Cao, Y. Tao, T. Li, Y. Zhang, H. Shang, J. Song and G. Li, *J. CO<sub>2</sub> Util.*, 2021, **54**, 101781.
15. H. Q. Xu, J. Hu, D. Wang, Z. Li, Q. Zhang, Y. Luo, S. H. Yu and H. L. Jiang, *J. Am. Chem. Soc.*, 2015, **137**, 13440-13443.
16. Y. Fu, H. Yang, R. Du, G. Tu, C. Xu, F. Zhang, M. Fan and W. Zhu, *RSC Adv.*, 2017, **7**, 42819-42825.
